# Supplementary material
Source: PubMed Central journal article supplement (PMC8366292)
Supplement: NIHMS1610765-supplement-Table_S2.pdf [file NIHMS1610765-supplement-Table_S2.pdf]

Table S2.

| Patient | Sex | Age | Biopsy type*            | Molecular pathology genetic testing of tumour tissue**                                    | Treatment prior to tissue collection for organoid generation? ***         | Treatment post tissue collection?      | Medium throughput drug screening of organoid? | Organoid and germline DNA WES? | Tumour tissue RNAseq? |
|---------|-----|-----|-------------------------|-------------------------------------------------------------------------------------------|---------------------------------------------------------------------------|----------------------------------------|-----------------------------------------------|--------------------------------|-----------------------|
| 1       | F   | 71  | Operative               | Primary tumor: <i>KRAS</i> ND, CRPM:NA.                                                   | 5FU monotherapy<br>FOLFOX                                                 | FOLFIRI+ EGFRi<br>FOLFOX<br>Vandetinib | pan-cancer 87 drug library                    | Yes                            | Yes                   |
| 2       | F   | 47  | Operative               | CRPM: <i>KRAS</i> ND, <i>NRAS</i> ND, <i>BRAF</i> ND.                                     | CAPOX/FOLFOX,                                                             | FOLFIRI + EGFRi<br>Gemcitabine         | pan-cancer 87 drug library                    | Yes                            | Yes                   |
| 3       | F   | 60  | Laparoscopy             | CRPM: <i>KRAS</i> ND, <i>NRAS</i> ND, <i>BRAF</i> ND.                                     | FOLFIRI + VEGFRi                                                          | FOLFOX +EGFRi<br>Regorafenib           | pan-cancer 87 drug library                    | Yes                            | Yes                   |
| 4       | M   | 78  | Operative               | CRPM: <i>KRAS</i> ND, <i>NRAS</i> ND, <i>BRAF</i> ND.                                     | 5-FU+chemo-radiation                                                      |                                        | pan-cancer 87 drug library                    | Yes                            | Yes                   |
| 5       | M   | 80  | Operative               | CRPM: <i>KRAS</i> p.Gly13Asp/c.38G>A, <i>NRAS</i> ND, <i>BRAF</i> ND.                     | FOLFOX + VEGFRi,<br>FOLFIRI + VEGFRi,<br>5-FU with radiation              | Nil                                    | pan-cancer 87 drug library                    | Yes                            | Yes                   |
| 6C#     | F   | 69  | Operative               | NA.                                                                                       | Chemo Naive                                                               | FOLFOX                                 | targeted 35 drug library                      | Yes                            | Yes                   |
| 6P#     |     |     |                         |                                                                                           |                                                                           |                                        | targeted 35 drug library                      |                                |                       |
| 7C#     | F   | 60  | Operative               | CRPM: <i>KRAS</i> ND, <i>NRAS</i> ND, <i>BRAF</i> ND.                                     | Chemo Naïve                                                               | FOLFOX                                 | targeted 35 drug library                      | Yes                            | Yes                   |
| 7P#     |     |     |                         |                                                                                           |                                                                           |                                        | targeted 35 drug library                      |                                |                       |
| 8       | F   | 34  | Operative <sup>##</sup> | Primary tumor: <i>KRAS</i> p.Gly13Asp/c.38 G>A, <i>NRAS</i> ND, <i>BRAF</i> ND. CRPM: NA. | 5-FU+ radiation                                                           | FOLFOX                                 | targeted 35 drug library                      | Yes                            | Yes                   |
| 9       | F   | 34  | Percutaneous            | CRPM: <i>KRAS</i> ND, <i>NRAS</i> ND, <i>BRAF</i> ND.                                     | FOLFOX,<br>FOLFOX + VEGFRi,<br>FOLFIRI + EGFRi, CAR-T cell trial, Lonsurf | Lonsurf                                | targeted 35 drug library                      | Yes                            | NA                    |
| 10      | F   | 59  | Operative               | CRPM: <i>KRAS</i> ND, <i>NRAS</i> MUT, <i>BRAF</i> ND.                                    | FOLFOX                                                                    | FOLFOX, FOLFIRI<br>CAR-T cell trial    | targeted 35 drug library                      | Yes                            | Yes                   |
| 11      | M   |     | Operative               | NA.                                                                                       | Oxaliplatin based                                                         | FOLFIRI                                | targeted 35 drug library                      | Yes                            | NA                    |
| 12      | F   | 57  | Laparoscopy             | CRPM: <i>KRAS</i> ND, <i>NRAS</i> ND, <i>BRAF</i> ND.                                     | FOLFOX                                                                    | FOLFOX+ EGFRi                          | targeted 35 drug library                      | Yes                            | Yes                   |
| 13      | F   | 35  | Operative               | NA.                                                                                       | Chemo naïve                                                               | FOLFOX+VEGFRi                          | NA                                            | Tissue WES                     | Yes C & P             |
| 14      | F   | 67  | Operative               | CRPM: <i>KRAS</i> ND, <i>NRAS</i> ND, <i>BRAF</i> ND                                      | CAPOX                                                                     | FOLFOX+EGFRi                           | targeted 35 drug library                      | Yes                            | NA                    |
| 15      | F   | 52  | Operative               | NA.                                                                                       | CAPOX, FOLFOX                                                             | FOLFOX                                 | targeted 35 drug library                      | NA                             | NA                    |
| 16      | F   | 63  | Operative               | NA.                                                                                       | FOLFOX, CAPOX,<br>FOLFIRI + EGFRi                                         | FOLFIRI                                | NA                                            | NA                             | Yes                   |
| 17      | F   | 83  | Operative               | NA.                                                                                       | CAPOX                                                                     | Capecitabine                           | NA                                            | NA                             | Yes                   |
| 18      | F   | 50  | Operative               | NA.                                                                                       | FOLFOX + VEGFRi,<br>CAPOX                                                 |                                        | targeted 35 drug library                      | NA                             | Yes                   |
| 19      | M   | 71  | Laparoscopy             | CRPM: <i>KRAS</i> p.Gly12Ala                                                              | FOLFOX                                                                    | FOLFOX                                 | NA                                            | NA                             | NA                    |

## Table S2. Patient characteristics & analyses.

#: Synchronous resection of primary tumour along with peritoneal metastases. C: colonic primary, P: peritoneal metastases

\* Operative: at time of cytoreductive surgery and hyperthermic intraperitoneal chemotherapy;

Laparoscopy: at time of staging laparoscopy to evaluate disease burden;

##Operative: operative specimen when surgery performed with palliative intent only; Percutaneous: needle biopsy guided by ultrasound/computed tomography.

\*\*Genetic testing in an independent lab.

\*\*\*Patient chemotherapy regimens prior to establishment of organoids:

FOLFOX: 5FU/Leucovorin+ Oxaliplatin; FOLFIRI: 5FU/leucovorin + irinotecan; EGFRi: monoclonal antibody inhibitor of epidermal growth factor receptor (cetuximab); CAPOX: capecitabine + Oxaliplatin; VEGFRi: Vascular endothelial growth factor receptor inhibitor (bevacizumab);

Lonsurf: Trifluridine and tipiracil

ND, genetic variant not detected in gene, MUT, genetic variant detected. CRPM, colorectal cancer peritoneal metastasis.

WES, whole exome sequencing. Numerous previous publications report the excellent concordance between genetic variants found in patient tumour samples and organoids derived from those same specimens. In particular the pivotal early metastatic colorectal cancer study (Weeber et al 2015 PNAS 112:13308-13311) noted 90% concordance in genetic alterations between tumour organoids and the source tissue, and that any discrepancies were never in driver mutations or in actionable drug targets. As such we undertook whole exome sequencing of patient-derived tumoroids and peritonoids only, not the source tissue. Molecular pathology testing of n=9 patient tissue samples for *KRAS*, *BRAF* and *NRAS* variants was undertaken in an independent pathology laboratory and is 100% concordant with our WES data from peritonoids.

RNAseq, mRNA sequencing.

NA, not available.
